# Supplementary material
Source: PubMed Central journal article supplement (PMC535097)
Supplement: 7600488s1.pdf [file 7600488s1.pdf]

# Supplementary Fig. 1

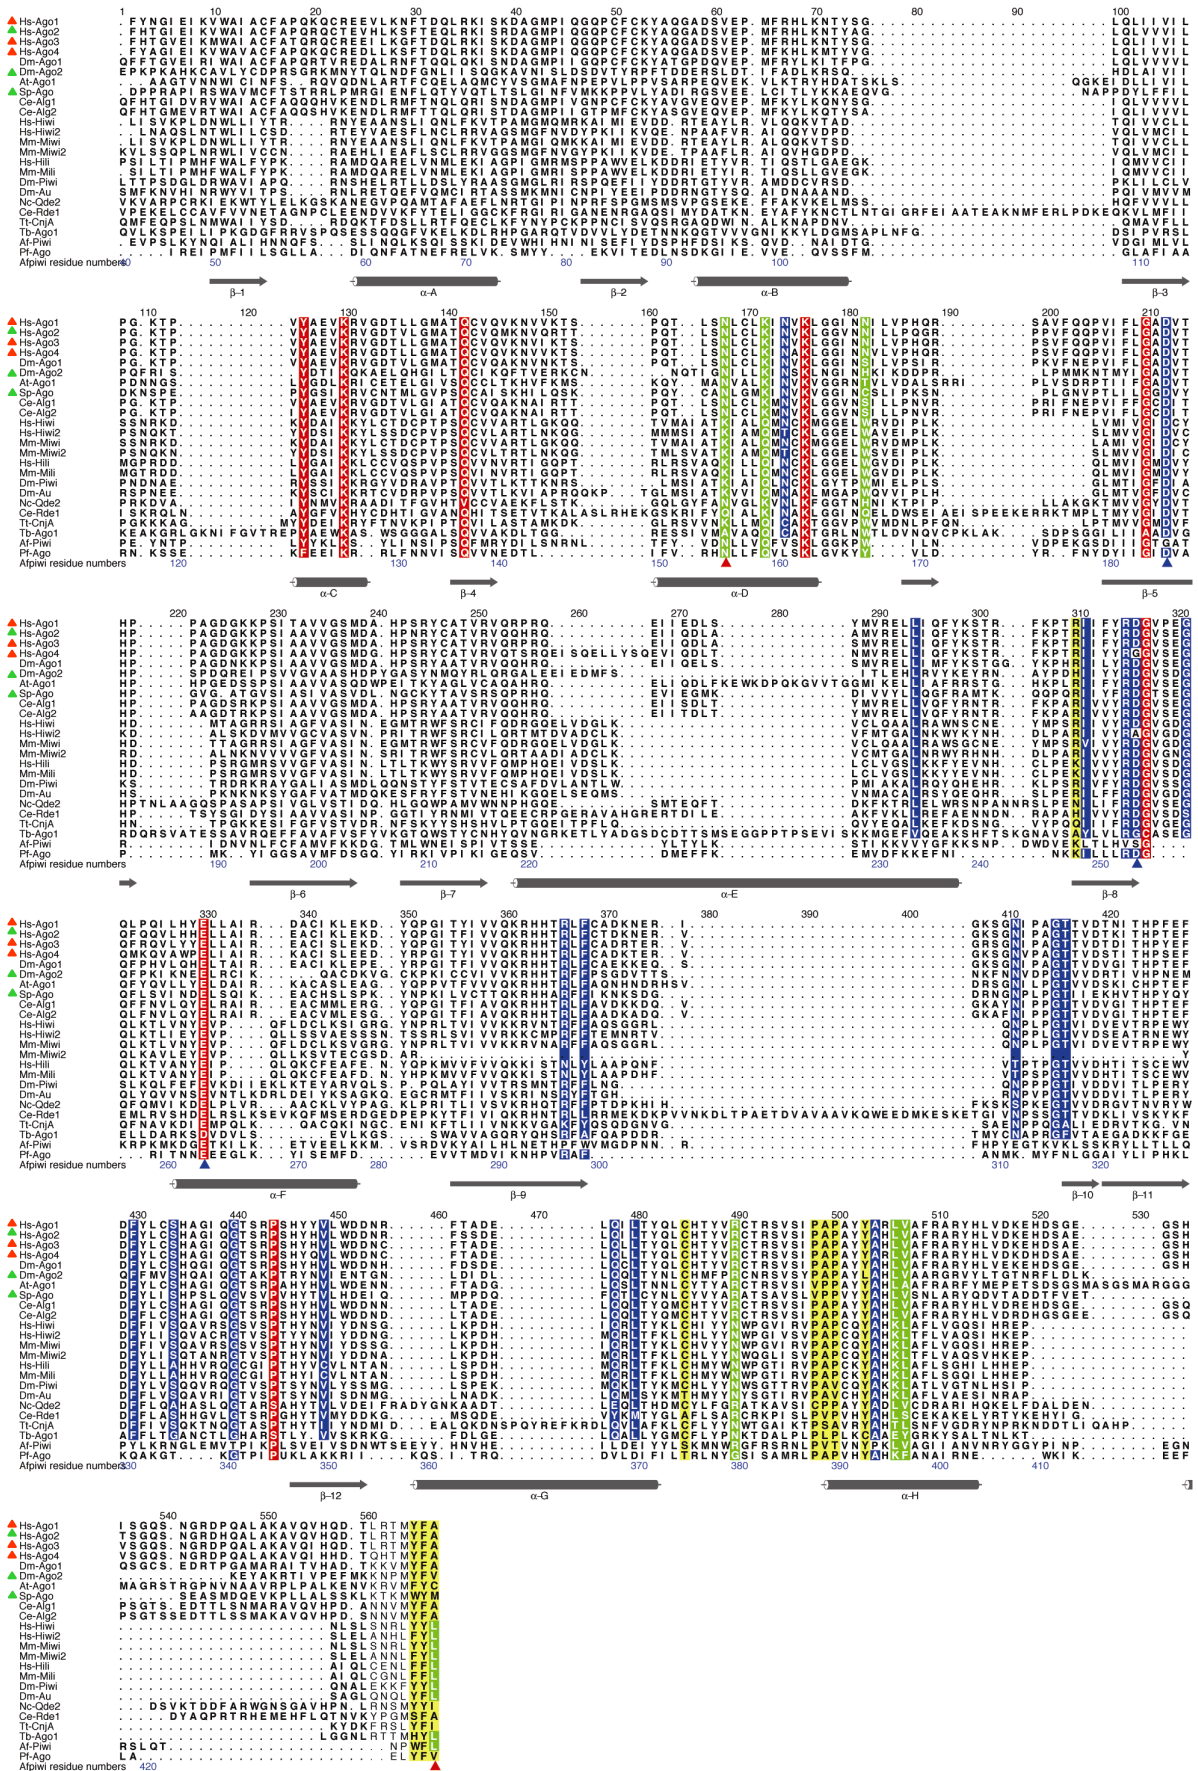

Supplementary Figure 1. Multiple sequence alignment of 22 eukaryotic Argonaute sequences and the two Archaeal sequences for which structural information is now known: AfPiwi and PfAgo. Residues are coloured as described in the text and legend to Fig. 1. Argonaute proteins that have been demonstrated to cleave mRNA (HsAgo2, DmAgo2, SpAgo) are denoted with a green circle, whereas those which have been shown not to cleave mRNA (HsAgo1, HsAgo3, HsAgo4) are indicated in red.
