# Supplementary material
Source: PubMed Central journal article supplement (PMC535097)
Supplement: 7600488s2.pdf [file 7600488s2.pdf]

# Supplementary Fig. 2

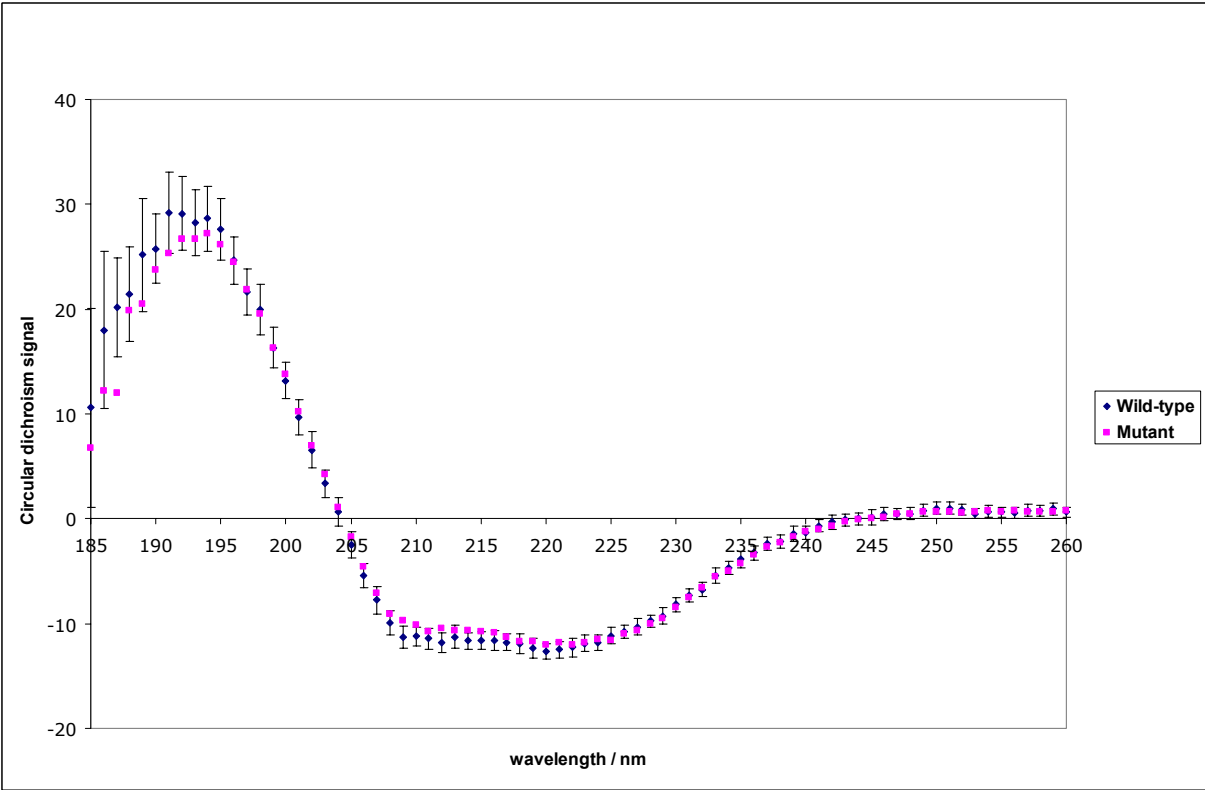

Supplementary Figure 2. Circular dichroism spectra of AF*Piwi* and AF*Piwi*<sup>MUT</sup> (superimposed). For analysis, protein samples were desalted into 10 mM Tris-acetate pH 7.5, 500 mM Na<sub>2</sub>SO<sub>4</sub>, 1 mM DTT and diluted to 1 mg/ml. Measurements were performed between 260 nm and 185 nm at 1 nm intervals, with a 1 nm bandwidth and 20 second averaging time. Values were corrected against a buffer curve and scaled according to concentration. Error bars are shown only for wild-type.
